# Supplementary material
Source: Springer Nature journal article supplement (https://www.springermedizin.de/resource/supplementary/12883_2009_326_MOESM1_ESM.pdf/9455152)

**MS**

**NMO**

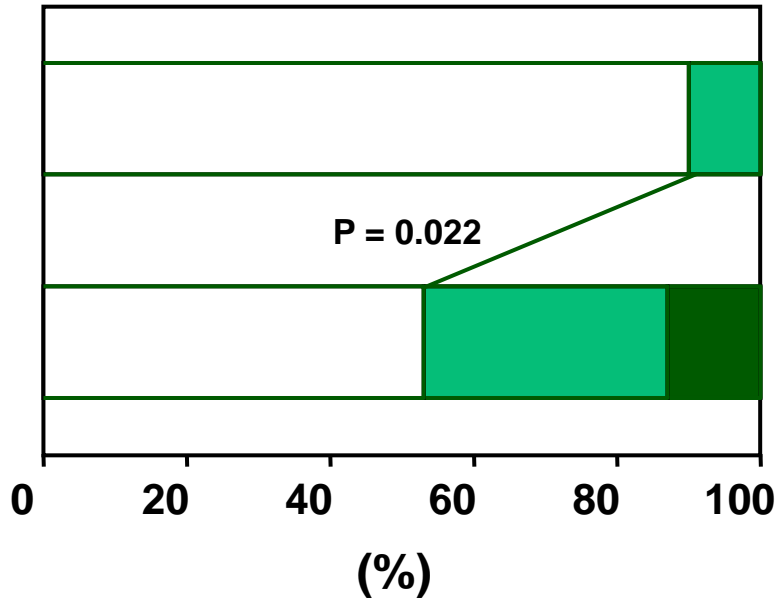

-  central every relapse
-  central + non-central
-  non-central every relapse

Supplement: MOESM1 [file 9455152]
